# Supplementary material for: Effects of Different Land Use Types and Soil Depths on Soil Mineral Elements, Soil Enzyme Activity, and Fungal Community in Karst Area of Southwest China
Source: MDPI journal article supplement (doi:10.3390/ijerph19053120), 2022-03-07
Supplement: s1 [file s1]

Supplementary Materials

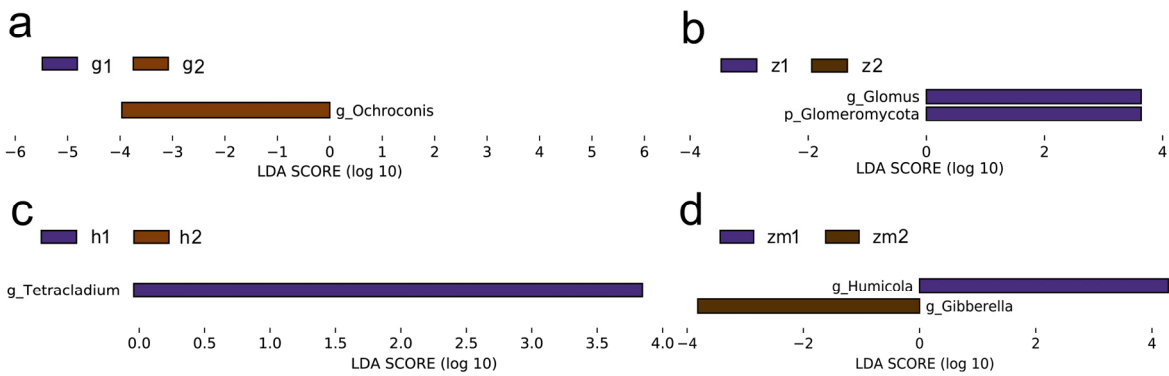

**Figure S1.** LDA of soil fungi with statistical difference between 0–20 cm and 20–40 cm soil depth in different land use types.

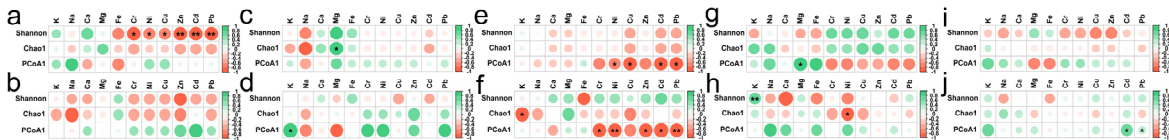

**Figure S2.** Spearman's Rank correlation coefficients between soil metal element content and soil fungal community variety.

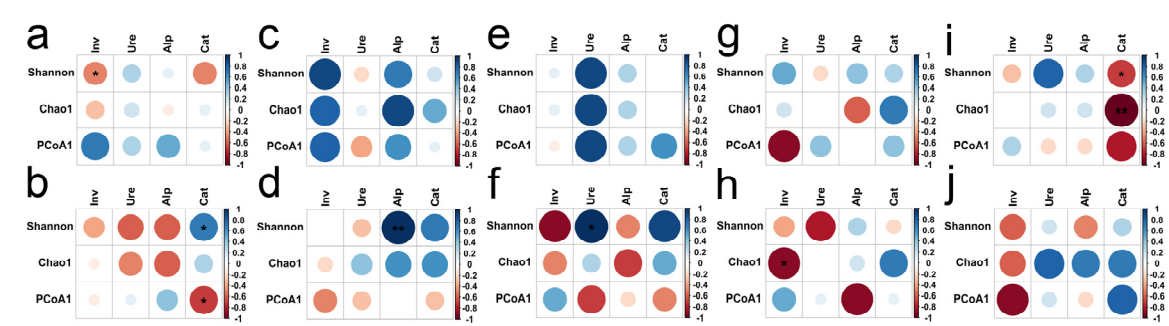

**Figure S3.** Spearman's Rank correlation coefficients between soil enzyme activity and soil fungal community variety

**Table S1.** Results of two-way ANOVA for the effects of land use types (LUT) and soil depths (SD) on soil contents of K, Na, Ca, Mg and Fe, F: F-value.

| Treatments | df | K       |                  | Na      |              | Ca      |              | Mg      |                  | Fe      |                  |
|------------|----|---------|------------------|---------|--------------|---------|--------------|---------|------------------|---------|------------------|
|            |    | F-value | <i>p</i>         | F-value | <i>p</i>     | F-value | <i>p</i>     | F-value | <i>p</i>         | F-value | <i>p</i>         |
| LUT        | 4  | 84.1    | <b>&lt;0.001</b> | 3.01    | <b>0.029</b> | 3.86    | <b>0.010</b> | 25.42   | <b>&lt;0.001</b> | 13.26   | <b>&lt;0.001</b> |
| SD         | 1  | 1.68    | 0.203            | 0.31    | 0.580        | 1.88    | 0.178        | 2.83    | 0.100            | 0.45    | 0.508            |
| LUT × SD   | 4  | 1.08    | 0.380            | 0.60    | 0.661        | 4.50    | <b>0.004</b> | 3.44    | <b>0.017</b>     | 1.75    | 0.157            |

**Table S2.** Results of two-way ANOVA for the effects of land use types (LUT) and soil depths (SD) on soil contents of Cr, Ni, Cu, Zn, Cd, and Pb, F: F-value.

| Treatm<br>ents | df | Cr          |              | Ni          |          | Cu          |                  | Zn          |              | Cd          |                  | Pb          |          |
|----------------|----|-------------|--------------|-------------|----------|-------------|------------------|-------------|--------------|-------------|------------------|-------------|----------|
|                |    | F-<br>value | <i>p</i>     | F-<br>value | <i>p</i> | F-<br>value | <i>p</i>         | F-<br>value | <i>p</i>     | F-<br>value | <i>p</i>         | F-<br>value | <i>p</i> |
| LUT            | 4  | 2.91        | <b>0.033</b> | 2.55        | 0.054    | 10.26       | <b>&lt;0.001</b> | 3.76        | <b>0.011</b> | 8.43        | <b>&lt;0.001</b> | 0.83        | 0.514    |
| SD             | 1  | 0.22        | 0.645        | 0.04        | 0.843    | 0.00        | 0.987            | 0.06        | 0.804        | 0.15        | 0.698            | 0.46        | 0.501    |
| LUT × SD       | 4  | 2.07        | 0.103        | 2.06        | 0.105    | 3.11        | <b>0.026</b>     | 1.78        | 0.151        | 2.02        | 0.110            | 1.92        | 0.125    |

**Table S3.** Results of two-way ANOVA for the effects of land use types (LUT) and soil depths (SD) on activity of Inv, Ure, Alp and Cat, F: F-value.

| Treatments | df | Inv     |                  | Ure     |                  | Alp     |                  | Cat     |                  |
|------------|----|---------|------------------|---------|------------------|---------|------------------|---------|------------------|
|            |    | F-value | <i>p</i>         | F-value | <i>p</i>         | F-value | <i>p</i>         | F-value | <i>p</i>         |
| LUT        | 4  | 25.6    | <b>&lt;0.001</b> | 30.78   | <b>&lt;0.001</b> | 19.53   | <b>&lt;0.001</b> | 2.11    | 0.098            |
| SD         | 1  | 34.83   | <b>&lt;0.001</b> | 56.65   | <b>&lt;0.001</b> | 60.42   | <b>&lt;0.001</b> | 14.84   | <b>&lt;0.001</b> |
| LUT × SD   | 4  | 7.98    | <b>&lt;0.001</b> | 35.77   | <b>&lt;0.001</b> | 8.81    | <b>&lt;0.001</b> | 3.90    | <b>&lt;0.001</b> |

**Table S4.** Results of two-way ANOVA for the effects of land use types (LUT) and soil depths (SD) on Shannon and Chao1, F: F-value.

| Treatments | df | Shannon |              | Chao 1  |              |
|------------|----|---------|--------------|---------|--------------|
|            |    | F-value | <i>p</i>     | F-value | <i>p</i>     |
| LUT        | 4  | 3.4     | <b>0.018</b> | 3.04    | <b>0.028</b> |
| SD         | 1  | 9.16    | <b>0.004</b> | 5.05    | <b>0.030</b> |
| LUT × SD   | 4  | 1.07    | 0.383        | 1.22    | <b>0.032</b> |
